# Supplementary material for: Fast bacterial growth reduces antibiotic accumulation and efficacy
Source: eLife. 2022 Jun 7;11:e74062. doi: 10.7554/eLife.74062 (PMC9173744; doi:10.7554/eLife.74062)
Supplement: Figure 2—source data 1. — Temporal patterns of elongation rate during exposure to the fluorescent derivative of roxithromycin for five representative E. coli bacteria that accumulated the drug and five representative E. coli bacteria that did not accumulate the drug. The fluorescent derivative of roxithromycin was delivered at t=0 at a concentration of 46 µg mL–1 and was dissolved in lysogeny broth (LB). [file elife-74062-fig2-data1.csv]

Time (s)/Bacterium identifier
0	10,58	8,67	9,60	9,60	7,69	0,00	4,80	5,78	5,78	9,93
339	6,76	9,65	5,78	5,78	9,98	0,00	4,80	5,78	5,78	3,87
899	5,24	4,69	6,44	4,09	4,69	0,00	9,33	10,53	10,53	6,44
1580	7,20	3,82	4,31	8,67	3,38	0,00	6,71	3,38	2,89	3,38
2260	3,87	4,31	3,87	2,89	8,18	0,00	4,31	6,76	6,27	5,78
3112	4,64	2,67	1,53	2,29	4,64	0,00	6,93	6,55	6,16	0,00
3957	2,73	4,25	1,64	2,73	2,35	0,00	4,64	2,35	0,00	0,00
4810	4,58	0,00	3,05	3,82	3,82	0,00	8,45	3,82	0,00	0,00
5488	4,36	0,00	2,62	1,91	2,40	0,00	4,80	4,36	0,00	0,00
6052	6,38	0,00	2,89	2,35	4,64	0,00	7,53	2,35	0,00	0,00
6743	6,16	0,00	0,49	3,33	2,84	0,00	9,00	1,91	0,00	0,00
7424	3,82	0,00	0,00	1,91	2,40	0,00	4,31	2,13	0,00	0,49
8105	4,31	0,00	0,00	0,98	0,98	0,00	2,95	2,40	0,00	0,00
