# Supplementary material for: Fast bacterial growth reduces antibiotic accumulation and efficacy
Source: eLife. 2022 Jun 7;11:e74062. doi: 10.7554/eLife.74062 (PMC9173744; doi:10.7554/eLife.74062)
Supplement: Figure 2—source data 2. — Correlation between each bacterium t0 and its average elongation rate throughout exposure to the fluorescent derivative of roxithromycin. [file elife-74062-fig2-data2.csv]

t0 (s)	Elongation rate (µm h-1)
7588,10	2,86
7732,52	1,32
7058,82	2,24
7075,46	0,89
7039,13	4,03
7654,08	4,54
4227,62	3,01
6279,85	2,65
6614,97	3,03
7720,20	2,96
8085,33	3,39
7088,44	4,04
7609,38	3,00
7,73	0,24
7103,12	3,44
7747,00	1,31
7716,65	5,56
7812,69	4,33
7983,57	3,40
3371,07	2,06
3,89	0,67
7374,66	4,29
7744,88	1,92
7159,16	2,47
1,14	0,63
2568,71	2,54
7092,69	3,08
3881,92	2,85
3439,43	0,76
5131,97	2,74
6366,67	0,68
7107,49	1,53
5724,23	3,52
6174,31	0,62
7055,31	3,21
3099,40	3,04
7144,30	2,59
7046,15	1,26
7110,22	3,68
5735,08	3,64
6894,55	1,90
6404,50	2,90
5816,41	2,64
7072,63	3,95
7725,63	7,64
5436,54	1,86
7090,54	2,95
5804,25	1,42
6913,98	4,09
7071,08	2,67
7080,13	4,20
