# Supplementary material for: Fast bacterial growth reduces antibiotic accumulation and efficacy
Source: eLife. 2022 Jun 7;11:e74062. doi: 10.7554/eLife.74062 (PMC9173744; doi:10.7554/eLife.74062)
Supplement: Figure 2—source data 3. [file elife-74062-fig2-data3.csv]

Before uptake	After uptake	No uptake
		2,86
		1,32
2,69	0,24
1,03	0,48
4,72	0,24
		4,54
5,64	0,75
3,83	0,58
3,85	0,32
		2,96
		1,47
		3,39
4,78	0,00
		1,12
		3,00
3,94	0,72
		1,31
		5,56
		4,33
		3,40
5,10	0,75
5,03	0,24
		1,92
2,91	0,48
6,20	0,25
3,85	0,00
5,69	0,41
2,30	0,54
4,85	0,33
0,94	0,32
3,28	1,20
1,96	0,24
4,87	0,48
0,96	0,16
3,86	0,24
3,12	0,48
1,44	0,72
4,22	0,72
5,26	0,00
2,77	0,16
3,98	0,00
3,70	0,27
4,83	0,00
2,90	0,33
3,36	0,72
2,47	0,12
5,31	0,00
3,33	0,00
4,75	1,20
