# Supplementary material for: Fast bacterial growth reduces antibiotic accumulation and efficacy
Source: eLife. 2022 Jun 7;11:e74062. doi: 10.7554/eLife.74062 (PMC9173744; doi:10.7554/eLife.74062)
Supplement: Figure 2—source data 4. [file elife-74062-fig2-data4.csv]

Elongation rate before treatment (µm h-1)	Elongation rate during treatment (µm h-1)
4,94	2,86
6,20	4,03
6,72	6,30
4,38	10,62
2,86	3,01
2,03	6,66
6,50	3,85
7,15	3,03
8,16	4,73
8,98	9,15
5,37	4,04
0,76	0,24
3,67	3,44
8,48	5,46
7,68	5,30
8,16	4,33
9,12	7,34
1,74	0,67
4,10	4,29
4,80	5,95
6,24	5,30
0,16	0,63
2,23	2,54
3,96	2,85
2,40	5,64
8,18	2,74
9,12	5,90
5,18	3,52
5,28	8,49
6,59	8,66
4,34	3,04
5,28	3,68
4,09	6,19
5,67	3,64
5,28	8,32
5,74	2,64
7,20	7,70
4,13	4,59
4,42	7,64
3,61	7,49
4,41	4,81
5,13	1,86
6,24	4,60
4,97	4,09
4,80	4,20
