# Supplementary material for: Fast bacterial growth reduces antibiotic accumulation and efficacy
Source: eLife. 2022 Jun 7;11:e74062. doi: 10.7554/eLife.74062 (PMC9173744; doi:10.7554/eLife.74062)
Supplement: Figure 2—source data 5. [file elife-74062-fig2-data5.csv]

Elongation rate before treatment (µm h-1)	Elongation rate during treatment (µm h-1)
4,37	3,27
3,27	3,35
4,53	1,73
7,67	4,78
4,92	3,75
4,20	3,25
3,71	2,96
5,39	3,20
3,60	4,29
4,51	5,67
3,19	5,30
2,33	2,92
3,44	4,79
3,50	2,37
4,33	5,28
4,70	3,74
3,98	2,91
4,33	2,17
8,16	4,01
4,19	5,57
4,13	1,41
5,81	6,21
3,61	5,71
4,10	4,46
3,11	2,36
5,79	2,43
4,01	3,31
2,72	4,28
5,88	3,90
0,42	0,48
0,51	0,30
6,61	5,71
4,27	3,75
3,70	4,45
4,35	4,72
4,61	1,68
4,56	5,46
3,79	1,75
6,97	3,02
4,24	4,00
3,34	3,57
2,82	5,13
8,19	7,48
3,55	2,58
4,68	6,04
4,85	5,31
3,65	3,33
5,18	8,55
2,54	1,14
4,05	3,38
4,38	3,51
