# Supplementary material for: Fast bacterial growth reduces antibiotic accumulation and efficacy
Source: eLife. 2022 Jun 7;11:e74062. doi: 10.7554/eLife.74062 (PMC9173744; doi:10.7554/eLife.74062)
Supplement: Figure 3—source data 1. — Dependence of the kinetic parameters t0, k1, and Fmax for the accumulation of fluorescent derivatives of polymyxin B and roxithromycin on the number of screening cells between the bacterium under investigation and the main microfluidic chamber where the drug is continuously injected. [file elife-74062-fig3-data1.csv]

Polymyxin-t0-0screens	Polymyxin-t0-1screens	Polymyxin-t0-2screens	Polymyxin-t0-3screens	Polymyxin-t0-4screens	Polymyxin-k1-0screens	Polymyxin-k1-1screens	Polymyxin-k1-2screens	Polymyxin-k1-3screens	Polymyxin-k1-4screens	Polymyxin-Fmax-0screens	Polymyxin-Fmax-1screens	Polymyxin-Fmax-2screens	Polymyxin-Fmax-3screens	Polymyxin-Fmax-4screens	Roxithromycin-t0-0screens	Roxithromycin-t0-1screens	Roxithromycin-t0-2screens	Roxithromycin-t0-3screens	Roxithromycin-t0-4screens	Roxithromycin-k1-0screens	Roxithromycin-k1-1screens	Roxithromycin-k1-2screens	Roxithromycin-k1-3screens	Roxithromycin-k1-4screens	Roxithromycin-Fmax-0screens	Roxithromycin-Fmax-1screens	Roxithromycin-Fmax-2screens	Roxithromycin-Fmax-3screens	Roxithromycin-Fmax-4screens
39,856380	29,977300	1,094913	2070,290000	1874,98700	588,449200	375,965000	623,305200	10,438000	10,724940	2867,640000	2653,900000	2494,920000	2168,730000	2470,680000	8344,770	8413,028	7117,180	8566,5830	8461,5400	1,4527900	2,6112960	1,8886400	2,4179460	1,718990	531,8640000	1117,8700000	1445,7400000	931,7370000	864,702000
30,790560	33,633900	46,661320	0,944609	2093,11600	299,795500	363,489000	438,913900	629,603000	9,132892	2862,400000	2864,670000	2850,370000	2381,390000	1884,730000	7788,823	8381,230	7719,846	8099,5100	8304,0970	0,4292677	1,6001500	0,6744684	0,7647260	1,686016	160,0700000	366,7910000	246,5000000	359,3380000	868,311000
29,980460	51,214400	3,411617	2146,600000	3122,05000	212,438800	526,062000	359,621300	8,412980	22,122600	2295,960000	2238,600000	2195,550000	1660,840000	1544,810000	7069,789	7031,210	6790,817	6685,7000	7729,7530	4,8690490	4,3605200	2,9752660	2,2838300	3,146390	1510,5100000	1556,9700000	1535,6700000	1355,7300000	1448,360000
49,173630	40,081200	1,880250	1987,052000	6,73478	484,733200	58,102300	416,506000	8,966503	243,018000	2238,210000	2252,810000	2235,820000	1963,850000	2244,160000	8367,527	8373,530	6486,958	6464,3500	7690,6550	1,2353700	1,1955300	1,4898730	1,2651900	2,924849	466,3840000	433,4040000	688,3160000	706,9340000	1499,650000
48,270300	46,608970	35,303300	2061,212000	92,49160	370,103000	133,592100	71,512300	10,092860	142,433000	2255,980000	2312,530000	2488,260000	2112,180000	2049,030000	7214,191	7675,820	8400,868	8458,7100	8359,0170	6,2107150	6,5381000	3,1084980	3,0494400	1,165978	1091,7800000	1089,6200000	1322,1300000	1403,0300000	358,278000
47,321600	50,743670	1,617080	25,206750	62,31830	487,613000	442,943300	423,642000	57,068420	196,495000	2513,750000	2313,770000	2257,330000	2440,860000	2599,850000	8989,857	8412,350	8385,091	8534,9800	8053,8300	4,1228880	1,7429200	2,7438020	2,5238100	4,664220	1560,1100000	556,1760000	1140,9800000	832,0540000	1233,960000
51,199000	47,395820	32,802100	6,882003	99,34150	398,971000	433,655100	269,379000	234,053400	150,477000	2322,050000	2424,920000	2499,930000	2289,880000	2357,580000	8596,927	9245,050	8563,498	8389,3200	6609,5500	0,9475647	1,6983900	2,6317220	1,4623700	1,761020	227,4770000	362,1100000	1138,6200000	397,8640000	1626,060000
0,100611	0,161592	41,594900	58,181570	84,02900	671,896000	642,707600	307,155000	212,134300	172,687000	2745,270000	2618,880000	2268,860000	2443,900000	2391,650000	8794,980	7687,382	8385,020	8405,7940	5456,1300	0,8703190	0,5041723	1,2994700	2,2475340	2,806270	223,4660000	260,7080000	648,5980000	1160,0400000	1898,630000
12,963900	24,287410	92,541500	60,179730	83,37770	362,355000	430,974900	249,043000	188,078000	221,912700	2415,720000	2563,800000	2371,170000	2393,230000	2376,070000	7248,264	7251,140	8485,911	7980,9900	4826,8800	13,7510200	27,2129000	2,8924780	2,7633700	0,962985	1449,6700000	1679,4700000	1424,8900000	1307,1400000	247,082000
31,295700	67,809990	79,917440	105,431700	79,42400	415,033000	319,131600	96,641780	345,446700	168,051000	2406,650000	2431,190000	2428,570000	2264,010000	2213,560000	9455,703	9590,360	9578,735	7572,4370	559,8940	1,3680790	1,3070400	1,5458340	6,7634660	1,861490	244,2530000	260,5920000	314,4330000	1373,2300000	295,289000
45,062470	80,611360	72,759500	150,421000	9,86277	320,305100	545,932400	74,051800	366,254000	261,453000	2372,950000	2329,100000	2170,580000	2182,480000	1997,170000	9043,980	9064,892	7043,180	6053,5980	4553,1990	3,6000900	4,0683900	1,4524500	1,3232500	8,844759	1416,7000000	1687,8000000	577,7570000	1515,4800000	1029,580000
40,725700	49,086800	62,007900	114,752500	1140,18000	144,834000	151,965000	95,824500	68,497420	102,071000	2114,360000	2417,050000	2197,360000	2120,940000	2312,990000	6136,890	3541,668	5324,480	9204,0010	6532,1920	2,5599500	19,1597200	1,7932200	5,7997680	6,927905	1864,7600000	2206,5000000	1931,0400000	2026,0300000	1466,590000
40,472500	46,135400	127,615000	57,186550	92,24240	191,578000	88,407410	150,900000	193,555000	178,121000	2098,430000	2146,190000	2060,880000	2194,380000	2238,620000	6789,485	6606,063	7807,600	4277,8700	7954,8700	1,5109210	1,3949240	1,1652000	2,8286200	3,719390	429,3780000	726,8520000	488,4790000	884,7180000	1588,290000
38,700000	45,537660	80,679900	120,098100	222,74000	108,118000	165,319500	215,150000	261,502700	221,110000	2155,600000	2129,120000	2171,970000	2162,270000	2179,340000	6699,030	6966,970	5041,757	5649,5740	6084,0900	1,3861500	4,1747000	1,4845130	0,5690892	3,249740	755,2900000	1140,7300000	999,9160000	510,7810000	1369,430000
40,007100	54,880800	43,939200	95,077320		156,849000	66,783810	62,126800	77,688880		2149,180000	2216,930000	2237,410000	2235,990000		8160,406	7525,894	5221,420	8857,5700	5655,1220	5,7759750	15,3021500	25,1307000	4,5130000	2,722979	1928,4100000	1803,9200000	873,0220000	1602,0100000	1517,760000
355,377000	38,833360	136,509000	102,897500		97,688700	93,644720	70,520000	170,950200		2244,590000	2145,780000	2181,070000			7254,500	7839,700	7892,794	6251,2900	6309,5930	18,4906000	1,4629000	3,6268850	7,4772400	5,823054	1780,6100000	465,9040000	1887,2700000	1102,8600000	906,301000
51,258200	51,886400				472,975000	414,902400				2095,750000	2058,850000				6773,331	6151,730	6897,060	7613,8990	6489,7900	0,6503762	0,4702600	3,4275500	3,3618270	2,440110	469,1610000	267,7080000	809,1860000	1755,7500000	599,585000
	60,534810					96,163280					2188,800000				6592,072	6427,101	6458,588	7996,8000	4952,8410	0,6932101	2,4010690	6,7515090	8,7996000	1,496957	447,2120000	2038,6600000	1038,9300000	1236,3200000	1724,510000
															6389,320	5968,260	6507,100	6890,2610	5029,1100	2,1451700	9,2910600	2,5561400	6,7894770	5,293290	1965,4600000	2039,7700000	2023,9200000	1143,3800000	1088,360000
															5875,690	7658,523	6245,498	7397,3400	5109,3810	10,0249500	12,6181200	4,6464960	6,8754300	4,076058	1645,0900000	1475,4900000	1603,6600000	1265,8200000	1471,510000
															8691,320	6080,430	7818,713	7799,2900	6885,0700	2,1318700	4,6279200	2,6356450	3,6785700	7,940050	638,7640000	1576,6300000	1612,9300000	1412,2000000	1393,070000
															7334,272	7694,540	7752,100	5730,7700	7307,6200	2,2250100	0,6029720	2,5878400	2,6535200	3,282400	759,3630000	234,2180000	1644,2700000	634,8160000	738,438000
															8667,137	6363,680	5869,521	5950,4040	6901,7670	2,9357970	1,6813200	2,5433550	1,8475750	5,604306	1404,8000000	1639,4000000	726,2620000	635,8860000	999,243000
															7630,253	7536,700	7388,330	6423,1200	7362,1210	6,6471190	2,8444400	5,3991500	1,4699600	6,450224	1128,0600000	730,4350000	1245,3800000	1107,9400000	1249,800000
															7463,795	6118,227	5629,392	2847,5760	5106,8100	5,6792120	9,8007580	1,7477640	9,5641780	1,267460	985,0020000	1847,3300000	1619,9400000	2129,1500000	1531,960000
															5295,540	5251,874	4951,887	4602,4600	4987,5690	1,7907300	2,4268150	0,4124709	2,1130100	3,748641	684,8650000	674,0410000	377,5050000	1698,8200000	1486,680000
															5336,890	8109,300	6430,950	7613,5700	5572,5600	1,2618700	5,1575000	0,4557910	3,0578700	5,751110	383,3350000	1986,4700000	382,3340000	619,3670000	1238,950000
															8087,678	2679,730	8008,016	6383,0200	5313,6950	3,8669360	3,6253600	1,2548280	1,1061350	1,871234	1443,8600000	2129,9100000	276,0330000	608,5010000	677,747000
															5104,499	6428,743	5470,600	4825,2930		9,4824290	3,2015700	1,2604300	1,7577130		2171,2600000	1383,0000000	572,0890000	445,9870000
															8219,030	6749,110	5632,188	6478,4700		1,3043300	2,1868100	14,7281000	6,9887200		600,4680000	1486,6000000	1794,5600000	1188,4000000
															6850,519	5749,550	8788,128	6293,8720		3,8112210	1,7112900	2,7900950	4,0000200		464,5320000	563,5730000	1001,2700000	753,6320000
															8717,952	6684,450	5463,060	6388,1460		1,6915880	2,6490500	2,0816200	1,0698890		649,0480000	763,5050000	540,5700000	504,9960000
															8338,000	2139,349	1818,910	7454,8400		1,2857200	0,2590936	1,6778100	4,1305600		446,2150000	263,7650000	2541,5400000	814,3000000
															10020,850	5619,650	6573,921	7806,6000		0,2844104	0,2490440	9,6879270	2,4942200		12,0524000	173,9390000	1380,5400000	1299,9900000
															7513,360	7162,433	3603,400	6174,3560		10,0870000	16,4423000	20,1467000	5,1242160		1295,2100000	1600,4200000	1799,3700000	841,0000000
															1895,370	5419,520	5891,090	6475,1200		0,2950511	12,9825000	0,5276694	1,4016620		341,3540000	1958,1000000	241,6040000	1272,5700000
															7823,661	7390,350	8783,801	6228,0900		9,8235960	3,5735600	1,7729030	6,4313900		1064,7800000	642,0100000	610,2650000	1421,2800000
															8375,950	1831,285	6662,240	36,4471		0,9612890	0,3059446	7,2447100	16,4639000		353,9910000	225,9970000	1130,3600000	678,1530000
															8290,440	4186,021	7140,190	4102,9640		1,3635000	1,3953590	5,6128200	1,2981020		290,3450000	533,6340000	1468,1200000	1678,5700000
															7928,232	7790,210	7043,900	3928,9400		3,0581700	3,8646200	2,8331200	0,6080310		1684,0900000	1869,3800000	720,0210000	396,8540000
															3477,630	3585,893	5447,301			30,2519000	29,4543900	3,3534820			1842,7100000	1825,3400000	1669,1500000
															9372,102	7806,040	1333,800			1,0665840	0,6875350	0,2445760			207,9160000	313,8050000	246,7490000
															2222,783	7682,560	7519,690			40,0749500	3,6779700	5,6371600			1925,5100000	660,2050000	1221,1600000
															7054,180	5260,672	6684,638			0,7632740	1,5932950	1,2012790			449,5590000	1612,8300000	506,3430000
															8488,110	5576,369	7710,193			2,4395400	3,2909280	4,8357720			1199,5500000	1539,8400000	985,0320000
															5874,980	5881,038	5295,380			10,2971000	17,1500700	1,6783800			1358,6400000	1391,6700000	542,5280000
															5898,291	5845,160	4876,119			10,4695800	23,9953000	3,5810170			1420,9500000	1742,4700000	784,3120000
															5496,650	5548,266	5648,800			0,2584190	0,4366275	0,3321850			121,3620000	230,5280000	201,3440000
															8147,450	6916,789	5828,440			2,9688500	3,2230050	5,4948200			1433,3400000	847,5310000	1008,0000000
															6076,487	7415,890	6241,992			0,4125415	5,8754100	1,7400280			165,1220000	1111,0200000	691,8930000
															7359,391	7855,690	4239,943			0,9255106	3,8185800	0,3941798			441,2340000	850,2890000	270,1090000
															6194,840	6629,085	3908,880			0,9906580	3,5784290	2,3893700			478,6250000	853,6350000	1738,3200000
															7963,592	7545,490	3710,357			3,4257520	6,8454600	0,2889951			707,4110000	1321,2300000	274,2500000
															7386,410	9151,733	4472,070			0,5860060	2,8723800	0,6457360			212,1710000	904,1700000	440,7140000
															6627,690	5944,401				0,4261370	0,4064918				229,8330000	249,4640000
															8185,430	7417,141				6,7959200	3,7076550				1381,0500000	856,2100000
															7189,950	5951,646				6,8803300	1,1897710				1243,4800000	503,4370000
															8004,432	7540,080				2,8425970	1,9037000				1372,7500000	1390,3200000
															6805,640	5181,250				0,4451493	0,4286230				174,4490000	311,3020000
															5687,700	3123,941				1,1744900	16,0244400				688,2390000	1811,5400000
															5895,206	5456,540				0,3423334	0,4308700				171,7980000	262,0540000
																6138,608					1,5294010					1595,7000000
