# Supplementary material for: Fast bacterial growth reduces antibiotic accumulation and efficacy
Source: eLife. 2022 Jun 7;11:e74062. doi: 10.7554/eLife.74062 (PMC9173744; doi:10.7554/eLife.74062)
Supplement: Figure 3—source data 2. — Antibiotic concentrations at the bacterial surface for bacteria with 0, 1, 2, 3 or 4 screening cells between themselves and the open end of the channel with an absorption rate of 0.2 mol m–2 s–1 or 0.002 mol m–2 s–1. [file elife-74062-fig3-data2.csv]

Time (min)	Flux=0.002 4 screens	Flux=0.02 4 screens	Flux=0.08 4 screens	Flux=0.2 4 screens	Flux=0.002 3 screens	Flux=0.02 3 screens	Flux=0.08 3 screens	Flux=0.2 3 screens	Flux=0.002 2 screens	Flux=0.02 2 screens	Flux=0.08 2 screens	Flux=0.2 2 screens	Flux=0.002 1screen	Flux=0.02 1screen	Flux=0.08 1screen	Flux=0.2 1screen	Flux=0.002 0screens	Flux=0.02 0screens	Flux=0.08 0screens	Flux=0.2 0screens
0	2,30000000e-009	1,68000000e-010	3,73000000e-014	5,39000000e-019	1,95000000e-008	4,52000000e-009	9,82000000e-012	2,36000000e-015	1,80000000e-007	1,25000000e-007	2,60000000e-009	1,05000000e-011	0,00000163	0,00000345	7,04000000e-007	5,250000e-008	0,00001240	0,00008850	0,00019200	0,000258
2	0,23981046	1,42203350	0,00002890	6,39000000e-011	0,23986664	2,39613686	0,00534532	2,22000000e-007	0,23992254	2,39829878	0,99861911	0,00078600	0,23996919	2,39932643	8,67532141	3,130000	0,24000798	2,39997432	9,59889205	23,100000
4	0,47981046	2,84859252	0,00005780	1,28000000e-010	0,47986664	4,79613686	0,01070109	4,45000000e-007	0,47992254	4,79829878	1,99916361	0,00157000	0,47996919	4,79932643	17,35848470	6,260000	0,48000798	4,79997432	19,19889200	46,300000
6	0,71981046	4,27515154	0,00008680	1,92000000e-010	0,71986664	7,19613686	0,01605686	6,68000000e-007	0,71992254	7,19829878	2,99970810	0,00236000	0,71996919	7,19932643	26,04164810	9,390000	0,72000798	7,19997432	28,79889200	69,500000
8	0,95981046	5,70171055	0,00011600	2,56000000e-010	0,95986664	9,59613686	0,02141263	8,90000000e-007	0,95992254	9,59829878	4,00025260	0,00315000	0,95996919	9,59932643	34,72481140	12,500000	0,96000798	9,59997432	38,39889200	92,600000
10	1,19981046	7,12826957	0,00014500	6,51000000e-009	1,19986664	11,99613690	0,02676840	0,00002270	1,19992254	11,99829880	5,00079710	0,08020000	1,19996919	11,99932640	43,40797470	24,600000	1,20000798	11,99997430	47,99889200	100,000000
12	1,43981046	8,55482859	0,00017400	1,57000000e-008	1,43986664	14,39613690	0,03212418	0,00005460	1,43992254	14,39829880	6,00134159	0,19300000	1,43996919	14,39932640	52,09113800	40,900000	1,44000798	14,39997430	57,59889200	100,000000
14	1,67981046	9,98138761	0,00020300	2,49000000e-008	1,67986664	16,79613690	0,03747995	0,00008660	1,67992254	16,79829880	7,00188609	0,30600000	1,67996919	16,79932640	60,77430140	57,100000	1,68000798	16,79997430	67,19889200	100,000000
16	1,91981046	11,40794660	0,00023200	3,40000000e-008	1,91986664	19,19613690	0,04283572	0,00011900	1,91992254	19,19829880	8,00243058	0,41900000	1,91996919	19,19932640	69,45746470	73,400000	1,92000798	19,19997430	76,79889200	100,000000
18	2,15981046	12,83450560	0,00026100	4,32000000e-008	2,15986664	21,59613690	0,04819149	0,00015000	2,15992254	21,59829880	9,00297508	0,53200000	2,15996919	21,59932640	78,14062800	89,700000	2,16000798	21,59997430	86,39889200	100,000000
20	2,39981046	14,26106470	0,00028900	0,00000166	2,39986664	23,99613690	0,05354726	0,00576913	2,39992254	23,99829880	10,00351960	4,79803649	2,39996919	23,99932640	86,82379140	100,000012	2,40000798	23,99997430	95,99889200	100,000006
22	2,63981046	15,68762370	0,00040900	0,00000605	2,63986664	26,39613690	0,07557363	0,02105110	2,63992254	26,39829880	12,81664240	16,23361900	2,63996919	26,39932640	96,04153380	100,000012	2,64000798	26,39997430	100,00004600	100,000006
24	2,87981046	17,11418270	0,00450829	0,00001040	2,87986664	28,79613690	0,83389369	0,03633308	2,87992254	28,79829880	19,76256880	27,66920160	2,87996919	28,79932640	100,00000300	100,000012	2,88000798	28,79997430	100,00004600	100,000006
26	3,11981046	18,54074170	0,01136534	0,00001480	3,11986664	31,19613690	2,10216728	0,05161505	3,11992254	31,19829880	28,69972440	39,10478410	3,11996919	31,19932640	100,00000300	100,000012	3,12000798	31,19997430	100,00004600	100,000006
28	3,35981046	19,96730070	0,01822239	0,00001920	3,35986664	33,59613690	3,37044086	0,06689703	3,35992254	33,59829880	37,63688000	50,54036660	3,35996919	33,59932640	100,00000300	100,000012	3,36000798	33,59997430	100,00004600	100,000006
30	3,59981046	21,39385980	0,02507944	0,00002360	3,59986664	35,99613690	4,63871445	0,08217900	3,59992254	35,99829880	46,57403560	61,97594920	3,59996919	35,99932640	100,00000300	100,000012	3,60000798	35,99997430	100,00004600	100,000006
32	3,83981046	22,82041880	0,03193649	0,00002800	3,83986664	38,39613690	5,90698803	0,09746098	3,83992254	38,39829880	55,51119120	73,41153170	3,83996919	38,39932640	100,00000300	100,000012	3,84000798	38,39997430	100,00004600	100,000006
34	4,07981046	24,24697780	0,03879354	0,00003240	4,07986664	40,79613690	7,17526162	0,11274296	4,07992254	40,79829880	64,44834690	84,84711430	4,07996919	40,79932640	100,00000300	100,000012	4,08000798	40,79997430	100,00004600	100,000006
36	4,31981046	25,67353680	0,04565059	0,00003680	4,31986664	43,19613690	8,44353520	0,12802493	4,31992254	43,19829880	73,38550250	96,28269680	4,31996919	43,19932640	100,00000300	100,000012	4,32000798	43,19997430	100,00004600	100,000006
38	4,55981046	27,10009580	0,05250764	0,00342083	4,55986664	45,59613690	9,71180878	5,97310276	4,55992254	45,59829880	82,32265810	100,00001600	4,55996919	45,59932640	100,00000300	100,000012	4,56000798	45,59997430	100,00004600	100,000006
40	4,79981046	28,52665490	0,05936469	0,00843814	4,79986664	47,99613690	10,98008240	14,63043300	4,79992254	47,99829880	91,25981370	100,00001600	4,79996919	47,99932640	100,00000300	100,000012	4,80000798	47,99997430	100,00004600	100,000006
42	5,03981046	29,95321390	0,07465578	0,01345545	5,03986664	50,39613690	12,38655610	23,28776320	5,03992254	50,39829880	100,00000600	100,00001600	5,03996919	50,39932640	100,00000300	100,000012	5,04000798	50,39997430	100,00004600	100,000006
44	5,27981046	31,37977290	0,48290157	0,01847276	5,27986664	52,79613690	20,02622060	31,94509350	5,27992254	52,79829880	100,00000600	100,00001600	5,27996919	52,79932640	100,00000300	100,000012	5,28000798	52,79997430	100,00004600	100,000006
46	5,51981046	32,80633190	0,89114735	0,02349007	5,51986664	55,19613690	27,66588510	40,60242370	5,51992254	55,19829880	100,00000600	100,00001600	5,51996919	55,19932640	100,00000300	100,000012	5,52000798	55,19997430	100,00004600	100,000006
48	5,75981046	34,23289090	1,29939312	0,02850738	5,75986664	57,59613690	35,30554960	49,25975400	5,75992254	57,59829880	100,00000600	100,00001600	5,75996919	57,59932640	100,00000300	100,000012	5,76000798	57,59997430	100,00004600	100,000006
50	5,99981046	35,65945000	1,70763890	0,03352469	5,99986664	59,99613690	42,94521410	57,91708420	5,99992254	59,99829880	100,00000600	100,00001600	5,99996919	59,99932640	100,00000300	100,000012	6,00000798	59,99997430	100,00004600	100,000006
52	6,23981046	37,08600900	2,11588467	0,03854200	6,23986664	62,39613690	50,58487850	66,57441440	6,23992254	62,39829880	100,00000600	100,00001600	6,23996919	62,39932640	100,00000300	100,000012	6,24000798	62,39997430	100,00004600	100,000006
54	6,47981046	38,51256800	2,52413045	0,04355931	6,47986664	64,79613690	58,22454300	75,23174470	6,47992254	64,79829880	100,00000600	100,00001600	6,47996919	64,79932640	100,00000300	100,000012	6,48000798	64,79997430	100,00004600	100,000006
56	6,71981046	39,93912700	2,93237622	0,04857662	6,71986664	67,19613690	65,86420750	83,88907490	6,71992254	67,19829880	100,00000600	100,00001600	6,71996919	67,19932640	100,00000300	100,000012	6,72000798	67,19997430	100,00004600	100,000006
58	6,95981046	41,36568600	3,34062200	0,05359393	6,95986664	69,59613690	73,50387200	92,54640520	6,95992254	69,59829880	100,00000600	100,00001600	6,95996919	69,59932640	100,00000300	100,000012	6,96000798	69,59997430	100,00004600	100,000006
60	7,19981046	42,79224500	3,74886777	1,01767398	7,19986664	71,99613690	81,14353640	100,00001100	7,19992254	71,99829880	100,00000600	100,00001600	7,19996919	71,99932640	100,00000300	100,000012	7,20000798	71,99997430	100,00004600	100,000006
62	7,43981046	44,21880410	4,15711355	7,94250109	7,43986664	74,39613690	88,78320090	100,00001100	7,43992254	74,39829880	100,00000600	100,00001600	7,43996919	74,39932640	100,00000300	100,000012	7,44000798	74,39997430	100,00004600	100,000006
64	7,67981046	45,64536310	4,56535932	14,86732820	7,67986664	76,79613690	96,42286540	100,00001100	7,67992254	76,79829880	100,00000600	100,00001600	7,67996919	76,79932640	100,00000300	100,000012	7,68000798	76,79997430	100,00004600	100,000006
66	7,91981046	47,07192210	8,26167390	21,79215530	7,91986664	79,19613690	100,00000800	100,00001100	7,91992254	79,19829880	100,00000600	100,00001600	7,91996919	79,19932640	100,00000300	100,000012	7,92000798	79,19997430	100,00004600	100,000006
68	8,15981046	48,49848110	14,85840480	28,71698240	8,15986664	81,59613690	100,00000800	100,00001100	8,15992254	81,59829880	100,00000600	100,00001600	8,15996919	81,59932640	100,00000300	100,000012	8,16000798	81,59997430	100,00004600	100,000006
70	8,39981046	49,92504010	21,45513570	35,64180950	8,39986664	83,99613690	100,00000800	100,00001100	8,39992254	83,99829880	100,00000600	100,00001600	8,39996919	83,99932640	100,00000300	100,000012	8,40000798	83,99997430	100,00004600	100,000006
72	8,63981046	51,35159920	28,05186660	42,56663660	8,63986664	86,39613690	100,00000800	100,00001100	8,63992254	86,39829880	100,00000600	100,00001600	8,63996919	86,39932640	100,00000300	100,000012	8,64000798	86,39997430	100,00004600	100,000006
74	8,87981046	52,77815820	34,64859750	49,49146370	8,87986664	88,79613690	100,00000800	100,00001100	8,87992254	88,79829880	100,00000600	100,00001600	8,87996919	88,79932640	100,00000300	100,000012	8,88000798	88,79997430	100,00004600	100,000006
76	9,11981046	54,20471720	41,24532840	56,41629080	9,11986664	91,19613690	100,00000800	100,00001100	9,11992254	91,19829880	100,00000600	100,00001600	9,11996919	91,19932640	100,00000300	100,000012	9,12000798	91,19997430	100,00004600	100,000006
78	9,35981046	55,63127620	47,84205920	63,34111790	9,35986664	93,59613690	100,00000800	100,00001100	9,35992254	93,59829880	100,00000600	100,00001600	9,35996919	93,59932640	100,00000300	100,000012	9,36000798	93,59997430	100,00004600	100,000006
80	9,59981046	57,05783520	54,43879010	70,26594500	9,59986664	95,99613690	100,00000800	100,00001100	9,59992254	95,99829880	100,00000600	100,00001600	9,59996919	95,99932640	100,00000300	100,000012	9,60000798	95,99997430	100,00004600	100,000006
82	9,83981046	58,48439430	61,03552100	77,19077210	9,83986664	98,39613690	100,00000800	100,00001100	9,83992254	98,39829880	100,00000600	100,00001600	9,83996919	98,39932640	100,00000300	100,000012	9,84000798	98,39997430	100,00004600	100,000006
84	10,07981050	60,23458140	67,63225190	84,11559910	10,07986660	100,00008300	100,00000800	100,00001100	10,07992250	100,00000200	100,00000600	100,00001600	10,07996920	100,00004900	100,00000300	100,000012	10,08000800	100,00013700	100,00004600	100,000006
86	10,31981050	62,63458140	74,22898280	91,04042620	10,31986660	100,00008300	100,00000800	100,00001100	10,31992250	100,00000200	100,00000600	100,00001600	10,31996920	100,00004900	100,00000300	100,000012	10,32000800	100,00013700	100,00004600	100,000006
88	10,55981050	65,03458140	80,82571370	97,96525330	10,55986660	100,00008300	100,00000800	100,00001100	10,55992250	100,00000200	100,00000600	100,00001600	10,55996920	100,00004900	100,00000300	100,000012	10,56000800	100,00013700	100,00004600	100,000006
90	10,79981050	67,43458140	87,42244460	100,00001200	10,79986660	100,00008300	100,00000800	100,00001100	10,79992250	100,00000200	100,00000600	100,00001600	10,79996920	100,00004900	100,00000300	100,000012	10,80000800	100,00013700	100,00004600	100,000006
92	11,03981050	69,83458140	94,01917550	100,00001200	11,03986660	100,00008300	100,00000800	100,00001100	11,03992250	100,00000200	100,00000600	100,00001600	11,03996920	100,00004900	100,00000300	100,000012	11,04000800	100,00013700	100,00004600	100,000006
94	11,27981050	72,23458140	100,00001300	100,00001200	11,27986660	100,00008300	100,00000800	100,00001100	11,27992250	100,00000200	100,00000600	100,00001600	11,27996920	100,00004900	100,00000300	100,000012	11,28000800	100,00013700	100,00004600	100,000006
96	11,51981050	74,63458140	100,00001300	100,00001200	11,51986660	100,00008300	100,00000800	100,00001100	11,51992250	100,00000200	100,00000600	100,00001600	11,51996920	100,00004900	100,00000300	100,000012	11,52000800	100,00013700	100,00004600	100,000006
98	11,75981050	77,03458140	100,00001300	100,00001200	11,75986660	100,00008300	100,00000800	100,00001100	11,75992250	100,00000200	100,00000600	100,00001600	11,75996920	100,00004900	100,00000300	100,000012	11,76000800	100,00013700	100,00004600	100,000006
100	11,99981050	79,43458140	100,00001300	100,00001200	11,99986660	100,00008300	100,00000800	100,00001100	11,99992250	100,00000200	100,00000600	100,00001600	11,99996920	100,00004900	100,00000300	100,000012	12,00000800	100,00013700	100,00004600	100,000006
102	12,23981050	81,83458140	100,00001300	100,00001200	12,23986660	100,00008300	100,00000800	100,00001100	12,23992250	100,00000200	100,00000600	100,00001600	12,23996920	100,00004900	100,00000300	100,000012	12,24000800	100,00013700	100,00004600	100,000006
104	12,47981050	84,23458140	100,00001300	100,00001200	12,47986660	100,00008300	100,00000800	100,00001100	12,47992250	100,00000200	100,00000600	100,00001600	12,47996920	100,00004900	100,00000300	100,000012	12,48000800	100,00013700	100,00004600	100,000006
106	12,71981050	86,63458140	100,00001300	100,00001200	12,71986660	100,00008300	100,00000800	100,00001100	12,71992250	100,00000200	100,00000600	100,00001600	12,71996920	100,00004900	100,00000300	100,000012	12,72000800	100,00013700	100,00004600	100,000006
108	12,95981050	89,03458140	100,00001300	100,00001200	12,95986660	100,00008300	100,00000800	100,00001100	12,95992250	100,00000200	100,00000600	100,00001600	12,95996920	100,00004900	100,00000300	100,000012	12,96000800	100,00013700	100,00004600	100,000006
110	13,19981050	91,43458140	100,00001300	100,00001200	13,19986660	100,00008300	100,00000800	100,00001100	13,19992250	100,00000200	100,00000600	100,00001600	13,19996920	100,00004900	100,00000300	100,000012	13,20000800	100,00013700	100,00004600	100,000006
112	13,43981050	93,83458140	100,00001300	100,00001200	13,43986660	100,00008300	100,00000800	100,00001100	13,43992250	100,00000200	100,00000600	100,00001600	13,43996920	100,00004900	100,00000300	100,000012	13,44000800	100,00013700	100,00004600	100,000006
114	13,67981050	96,23458140	100,00001300	100,00001200	13,67986660	100,00008300	100,00000800	100,00001100	13,67992250	100,00000200	100,00000600	100,00001600	13,67996920	100,00004900	100,00000300	100,000012	13,68000800	100,00013700	100,00004600	100,000006
116	13,91981050	98,63458140	100,00001300	100,00001200	13,91986660	100,00008300	100,00000800	100,00001100	13,91992250	100,00000200	100,00000600	100,00001600	13,91996920	100,00004900	100,00000300	100,000012	13,92000800	100,00013700	100,00004600	100,000006
118	14,15981050	100,00020400	100,00001300	100,00001200	14,15986660	100,00008300	100,00000800	100,00001100	14,15992250	100,00000200	100,00000600	100,00001600	14,15996920	100,00004900	100,00000300	100,000012	14,16000800	100,00013700	100,00004600	100,000006
120	14,39981050	100,00020400	100,00001300	100,00001200	14,39986660	100,00008300	100,00000800	100,00001100	14,39992250	100,00000200	100,00000600	100,00001600	14,39996920	100,00004900	100,00000300	100,000012	14,40000800	100,00013700	100,00004600	100,000006
