# Supplementary material for: Fast bacterial growth reduces antibiotic accumulation and efficacy
Source: eLife. 2022 Jun 7;11:e74062. doi: 10.7554/eLife.74062 (PMC9173744; doi:10.7554/eLife.74062)
Supplement: Figure 4—source data 1. — Interdependence between single-cell elongation rate before treatment and the onset t0, the rate k1, and the saturation Fmax in the accumulation of the fluorescent derivative of octapeptin. [file elife-74062-fig4-data1.csv]

Elongation rate (µm/h)	k1	t0	Fmax
7,281462532	41,60000000	460,0000	2377,37
5,088870286	104,98100000	251,7430	2452,27
6,500120216	21,20000000	2290,0000	1441,55
10,058027080	171,00000000	288,0000	2374,80
6,102210080	85,10000000	193,0000	2587,63
7,107754602	5,71828000	1393,3300	2156,88
8,968388572	114,44900000	268,5930	2681,68
5,571616462	3,96709000	1110,9000	1958,29
7,736943907	175,00000000	279,0000	2323,64
5,771061872	112,00000000	242,0000	2547,82
6,842717540	3,86000000	1100,0000	2020,79
9,022274911	140,00000000	253,0000	2423,41
6,222095902	3,27000000	1400,0000	2060,92
9,401748186	46,80000000	315,0000	2367,89
5,880638137	4,80355000	1445,3000	1705,29
5,415860735	5,09707000	1081,6200	2316,94
11,289471740	115,06800000	309,5800	2414,92
6,232633929	4,05985000	1305,7400	1796,77
9,208324589	153,12800000	266,4280	2510,55
4,642166344	60,25660000	240,4100	2533,71
5,800137369	15,30000000	2100,0000	1821,27
8,139056499	77,70000000	263,0000	2351,97
7,133218733	44,40000000	293,0000	2202,61
6,450867957	5,34000000	464,0000	2048,53
6,189555126	100,00000000	256,0000	2497,14
6,815633232	10,74410000	1398,5300	1913,23
7,236665088	75,63790000	199,9520	2517,16
