# Supplementary material for: Fast bacterial growth reduces antibiotic accumulation and efficacy
Source: eLife. 2022 Jun 7;11:e74062. doi: 10.7554/eLife.74062 (PMC9173744; doi:10.7554/eLife.74062)
Supplement: Figure 4—source data 2. — Interdependence between single-cell elongation rate before treatment and the onset t0, the rate k1, and the saturation Fmax in the accumulation of the fluorescent derivative of tachyplesin. [file elife-74062-fig4-data2.csv]

Elongation rate (µm/h)	k1	t0	Fmax
3,98000000	5,744840	840,370000	2724,66
8,76000000	452,882000	216,985000	2704,07
5,24000000	151,905000	239,626000	2989,68
9,47000000	424,907000	117,949000	2628,27
4,24000000	157,000000	223,000000	2950,00
12,00000000	144,861000	96,843800	2707,35
10,13000000	420,000000	226,000000	2420,00
12,00000000	213,720000	131,924000	2585,95
4,11000000	3,630000	91,100000	3230,00
12,00000000	205,551000	182,882000	3330,50
4,93000000	402,000000	190,000000	2870,00
5,20000000	139,000000	120,000000	2890,00
6,57000000	446,000000	219,000000	2920,00
4,60000000	3,440000	103,000000	3220,00
6,03000000	419,052000	241,709000	2886,72
4,66000000	147,857000	136,843000	2803,06
9,59000000	477,109000	124,292000	2930,78
4,20000000	185,161000	213,509000	2953,73
7,39000000	463,648000	220,470000	2593,47
5,11000000	169,534000	183,283000	2885,95
9,04000000	389,190000	126,893000	2735,70
3,69000000	138,000000	119,000000	2910,00
6,57000000	374,000000	228,000000	2590,00
4,50000000	202,000000	217,000000	2990,00
2,48000000	394,000000	226,000000	2290,00
2,64000000	393,000000	114,000000	2800,00
4,02000000	3,032390	309,583000	2515,77
4,23000000	377,048000	222,918000	2332,10
4,34000000	2,555470	147,416000	2347,36
4,73000000	103,282000	173,730000	2142,64
	54,600000	237,000000	1530,00
