# Supplementary material for: Fast bacterial growth reduces antibiotic accumulation and efficacy
Source: eLife. 2022 Jun 7;11:e74062. doi: 10.7554/eLife.74062 (PMC9173744; doi:10.7554/eLife.74062)
Supplement: Figure 4—source data 3. — Interdependence between single-cell elongation rate before treatment and the onset t0, the rate k1, and the saturation Fmax in the accumulation of the fluorescent derivative of trimethoprim. [file elife-74062-fig4-data3.csv]

Elongation rate (µm/h)	k1	t0	Fmax
8,80000000	0,35808200	2528,3200	238,4360
8,13000000	0,23757900	1525,1400	239,6510
11,26000000	0,57838500	895,4860	299,3840
7,25000000	0,22283200	2198,7000	256,9040
9,38000000	0,25900000	1710,0000	271,8870
8,84000000	0,21139100	1579,8300	280,9770
7,57000000	0,16600000	641,0000	258,8940
8,98000000	0,18433500	794,7800	267,2270
6,99000000	0,35600000	1400,0000	264,2690
6,97000000	0,28800000	892,0000	249,9570
11,21000000	0,22500000	6010,0000	222,4990
8,35000000	0,38610200	2296,7200	237,2710
8,58000000	0,20760500	1573,6500	241,3440
9,86000000	0,30322000	775,9220	232,7230
7,93000000	0,51779200	493,3920	287,2210
7,15000000	0,27306500	2585,5700	224,5460
9,66000000	0,33762100	1439,2300	232,1890
10,99000000	1,08000000	9390,0000	199,3190
10,07000000	0,27280300	1645,0100	242,6190
9,92000000	0,14756000	3361,9700	244,3010
6,67000000	0,54532900	1628,9500	236,9430
8,04000000	0,38900000	2510,0000	224,7210
9,18000000	0,29865100	1179,9900	259,1470
7,13000000	0,27300400	1336,8700	259,5880
8,71000000	0,38521300	850,4980	211,7840
6,38000000	0,17436800	2123,8800	271,1030
6,06000000	0,04780000	4960,0000	53,7505
7,63000000	0,38800000	2520,0000	215,2600
11,36000000	0,29800000	1330,0000	246,8700
6,15000000	0,17900000	1650,0000	253,3430
6,97000000	0,22800000	1370,0000	231,1000
8,43000000	0,20600000	1690,0000	251,8580
6,82000182	0,49400000	3400,0000	304,6920
7,37219337	0,32387000	1705,7800	303,0360
5,31566765	0,32849900	1819,5400	298,8450
8,23000166	0,42066700	4515,4200	225,4180
9,47853434	0,36681500	1512,0900	258,2810
8,46315871	0,46193100	1894,1800	283,9070
7,01760834	0,27600000	2330,0000	239,5940
10,05435690	0,44800000	1810,0000	254,4850
6,01353299	0,41900000	3420,0000	218,3090
8,16207124	0,29900000	3310,0000	294,9840
8,33266821	0,34900000	1690,0000	296,2150
8,43604291	0,47600000	3120,0000	261,2600
8,95194910	0,41100000	3040,0000	243,1080
11,20600210	0,27400000	3550,0000	228,2430
7,78250170	0,32412900	3253,9100	237,3870
8,16207124	0,28818200	1949,9800	270,0700
6,89600128	0,29570700	1515,1900	273,7950
8,24239684	0,49120900	3283,4700	256,3750
11,84816790	0,57258100	3191,3700	278,1830
12,93000240	0,15811100	3209,0800	292,2530
7,24727524	0,24900000	1470,0000	284,1310
11,31187390	0,20039400	1732,8700	247,6660
7,86854160	0,35641200	3163,3800	194,7710
6,91313152	0,48900000	3280,0000	219,6330
9,47853434	0,56400000	4560,0000	214,9240
8,27352584	0,38600000	1510,0000	261,8650
9,21524172	0,25100000	1770,0000	254,3550
10,63133530	0,33900000	5590,0000	195,3570
