# Supplementary material for: Fast bacterial growth reduces antibiotic accumulation and efficacy
Source: eLife. 2022 Jun 7;11:e74062. doi: 10.7554/eLife.74062 (PMC9173744; doi:10.7554/eLife.74062)
Supplement: Figure 4—source data 4. — Interdependence between single-cell elongation rate before treatment and the onset t0, the rate k1, and the saturation Fmax in the accumulation of the fluorescent derivative of roxithromycin. [file elife-74062-fig4-data4.csv]

elongation rate (µm/h)	k1 (a.u. s-2)	t0 (s)	Fmax (a.u.)
7,87	5,22	409,62	2427,72
4,77	1,02	1340,00	2340,00
2,85	1,72	1893,92	2427,29
5,29	1,16	587,22	2294,40
3,84	1,13	1812,64	2468,27
5,32	0,66	33,38	2744,91
2,02	0,72	73,07	2688,80
5,13	0,69	1828,01
7,44	1,03	1088,29	2781,69
1,51	0,67	151,80	2876,59
4,79	0,94	369,36	2955,95
3,68	0,50	316,60	2774,40
4,41	0,55	249,15	2354,53
5,74	2,51	831,00	2870,00
0,66	0,63	103,00	2900,00
3,82	1,16	1640,00
2,54	0,79	394,00	2840,00
2,85	1,01	728,00	2680,00
8,52	0,56	912,00	1550,00
3,91	0,62	279,00	2640,00
0,09	11,55	131,60	2531,11
0,17	0,55	68,00	2630,00
0,17	0,34	158,82	1586,69
0,49	0,24	264,00	678,00
6,10	0,69	380,05	2072,20
9,75	0,54	4370,00	1230,00
3,86	1,74	1998,97	2042,52
6,20	1,48	1113,77	2390,86
4,62	1,80	2012,71	2072,43
5,95	0,23	2809,28	559,91
4,75	0,50	1935,94	1936,23
8,57	0,40	740,00	1130,00
4,84	4,84	287,00	2440,00
4,81	2,72	517,00	1100,00
9,67	0,33	3480,00	726,00
6,04	0,59	397,00	2050,00
6,55	0,51	823,00	1340,00
11,16	0,25	4540,00	280,00
4,88	0,51	133,63	2398,93
8,27	2,15	4867,86	1738,04
6,68	0,55	754,40	2202,86
10,49	0,28	2550,00	671,00
4,18	0,30	2260,00	967,00
5,70	0,36	1300,00	409,00
11,89	0,41	4140,00	916,00
4,39	0,93	770,97
8,68	0,23	1954,96	732,88
5,95	0,44	138,38	2280,95
8,18	0,45	3334,61	1060,98
