# Supplementary material for: Fast bacterial growth reduces antibiotic accumulation and efficacy
Source: eLife. 2022 Jun 7;11:e74062. doi: 10.7554/eLife.74062 (PMC9173744; doi:10.7554/eLife.74062)
Supplement: Figure 4—source data 5. — Correlation between single-cell GFP fluorescence, as a proxy for the expression of tolC promoter and the single-cell kinetic parameter t0 describing the onset in the accumulation of roxithromycin-DMACA (at an extracellular concentration of 192 µg mL–1). [file elife-74062-fig4-data5.csv]

Av differential total GFP expression (a.u./h)	t0 (s)
8527	2010
8555	2045
6586	1340
10620	1088
12344	4070
17840	4830
9206	1894
5709	2809
5981	2080
15574	4926
6313	1813
7780	1870
4260	2292
7830	945
9151	587
5109	1828
6935	1860
7502	417
10597	1640
625	1310
11841	3370
12450	612
7566	369
13830	1831
5002	152
13498	3017
11963	102
2937	201
5534	103
7235	3081
10505	768
4890	1760
10667	1998
14060	2718
