# Supplementary material for: Fast bacterial growth reduces antibiotic accumulation and efficacy
Source: eLife. 2022 Jun 7;11:e74062. doi: 10.7554/eLife.74062 (PMC9173744; doi:10.7554/eLife.74062)
Supplement: Figure 4—source data 6. — Correlation between single-cell GFP fluorescence, as a proxy for the expression of ompC promoter and the single-cell kinetic parameter k1 describing the rate of uptake in the accumulation of roxithromycin-DMACA (at an extracellular concentration of 192 µg mL–1). [file elife-74062-fig4-data6.csv]

Av differential total GFP expression (a.u./h)	k1 (a.u. s-2)
69308	0,32
54492	0,37
73342	0,38
50208	0,73
136123	1,79
83563	0,88
80244	0,60
49199	0,65
35288	0,36
153317	1,22
80559	0,52
124866	2,92
58138	2,06
72534	0,19
93316	2,75
33597	0,66
93848	1,81
36508	2,06
86324	3,99
68934	3,80
107670	1,69
56533	1,41
36299	1,68
25925	1,50
39660	0,73
97394	2,04
76783	4,16
9693	0,71
133680	0,83
40548	0,71
