# Supplementary material for: Fast bacterial growth reduces antibiotic accumulation and efficacy
Source: eLife. 2022 Jun 7;11:e74062. doi: 10.7554/eLife.74062 (PMC9173744; doi:10.7554/eLife.74062)
Supplement: Figure 4—source data 7. — Correlation between single-cell GFP fluorescence, as a proxy for the expression of rrnB promoter and the single-cell kinetic parameter Fmax describing the saturation level in the accumulation of roxithromycin-DMACA (at an extracellular concentration of 192 µg mL–1). [file elife-74062-fig4-data7.csv]

Av differential total GFP expression (a.u./h)	Fmax (a.u.)
238498	2420
438319	1714
275351	2276
289601	2599
389475	1497
227168	2757
466767	1553
208838	2812
173427	3111
652793	906
473692	1782
490532	2203
428028	1353
651779	529
273189	2062
316870	2567
8474	2628
512728	807
437528	512
628093	557
302898	1530
523014	971
425993	1433
427156	1257
447660	1498
605386	804
581531	620
256927	2667
257109	2820
512626	1636
69290	1988
645092	2102
416825	695
