# Supplementary material for: Fast bacterial growth reduces antibiotic accumulation and efficacy
Source: eLife. 2022 Jun 7;11:e74062. doi: 10.7554/eLife.74062 (PMC9173744; doi:10.7554/eLife.74062)
Supplement: Figure 4—source data 8. — Correlation between single-cell GFP fluorescence, as a proxy for the expression of rrnH promoter, and the single-cell kinetic parameter Fmax describing the saturation level in the accumulation of roxithromycin-DMACA (at an extracellular concentration of 192 µg mL–1). [file elife-74062-fig4-data8.csv]

Av differential total GFP expression (a.u./h)	Fmax (a.u.)
178998	2220
242213	2014
163567	2476
183067	2299
299650	997
121445	1757
341178	1553
172250	1612
109618	2011
425195	906
355795	1282
367021	2203
245352	1353
414520	529
152126	2062
231247	2567
59495	2928
301819	1307
241685	1512
448729	557
241932	1530
308676	1171
263995	1433
294771	1257
208440	1498
463590	804
357687	820
171285	2867
271406	2220
341751	1636
49193	1288
470061	1102
237884	1295
121285	2567
291406	1220
