# Supplementary material for: Fast bacterial growth reduces antibiotic accumulation and efficacy
Source: eLife. 2022 Jun 7;11:e74062. doi: 10.7554/eLife.74062 (PMC9173744; doi:10.7554/eLife.74062)
Supplement: Figure 5—source data 1. — Distributions of single-cell values for the kinetic parameters t0, k1 and Fmax describing the accumulation of the fluorescent derivative of roxithromycin (at 46 µg mL–1 in M9) in the E. coli BW25113 parental strain (PS), the knockout mutant ΔtolC and the parental strain co-treated with unlabelled polymyxin B at 1 µg mL–1 extracellular concentration. [file elife-74062-fig5-data1.csv]

t0-Parental strain (PS)	t0-ΔtolC	t0-PS+polymyxinB	k1-Parental strain (PS)	k1-ΔtolC	k1-PS+polymyxinB	Fmax-Parental strain (PS)	Fmax-ΔtolC	Fmax-PS+polymyxinB
8461,5400	5366,61000	6502,800	2,2177300	2,360310	2,215380	872,200	1220,5700	490,657
8570,0000		5410,000	2,5700000		4,690000	920,417		579,000
7117,1800	5180,45000	3483,710	3,0428200	0,939027	2,724850	1606,610	620,4610	654,215
8410,0000	5240,00000	2280,000	2,9000000	3,710000	1,840000	1155,900	2400,0000	685,000
8344,7700	5711,03000	1468,520	1,3513200	4,899410	1,059540	522,916	2025,7100	544,127
8300,0000	5380,00000		2,8600000	1,050000		875,722	586,0000
8099,5100	5744,41000	6581,340	1,7165400	1,305480	2,867800	366,689	569,8320	554,693
7720,0000	6600,00000	5160,000	1,5900000	7,170000	1,440000	244,218	1460,0000	629,000
8381,2300	5988,99000	3585,660	3,5108300	0,601499	3,137390	383,173	187,7960	678,563
7790,0000	3530,00000	3380,000	0,3120000	15,000000	3,180000	151,417	2740,0000	617,000
6685,7000	6307,65000	3246,380		4,854670	3,701330	0,000	2325,6300	607,030
6790,0000	6220,00000	2540,000	3,9900000	1,510000	3,080000	1678,130	471,0000	661,000
7031,2100	4438,52000	2103,440	4,0589500	0,901566	2,637270	1795,430	743,6990	559,457
7070,0000	5860,00000	2030,000	4,1000000	2,310000	1,900000	1761,950	687,0000	604,000
6318,5400	4309,15000	5166,290	2,7784000	0,951226	1,462670	1499,600	668,6380	594,510
7730,0000	6680,00000	4240,000	3,7600000	1,500000	2,710000	1554,170	357,0000	616,000
6464,3500	6566,05000	2469,570	1,3425300	1,313550	2,983260	705,751	420,1100	698,342
6490,0000	7830,00000	3250,000	1,4400000	0,448000	6,780000	653,744	14,5000	445,000
8373,5300		2896,570	2,7663000		5,880600	458,535		423,161
8370,0000	4070,00000	4980,000	2,7900000	0,937000	2,430000	476,779	435,0000	604,000
8598,6900		3482,760	4,0543100		1,853310	1932,040		725,026
7690,0000	4650,00000	2740,000	3,5400000	1,140000	2,060000	1635,930	770,0000	676,000
8458,7100	5151,44000	1648,900	3,8071400	2,245760	1,454700	1609,850	1647,4400	594,521
8400,0000	6460,00000	4310,000	3,5600000	6,730000	3,110000	1295,690	1760,0000	644,000
7675,8200	5652,96000	3508,590	1,3563100	1,055320	2,010690	970,689	345,3780	710,987
7210,0000	4430,00000	2390,000	1,3500000	0,752000	4,190000	1044,620	529,0000	780,000
8534,9800	6682,70000	2359,850	3,4848100	16,003200	3,638450	954,601	1413,7200	607,610
8390,0000	6450,00000	4100,000	3,0500000	4,130000	0,961000	1160,780	1520,0000	640,000
8412,3500	5331,17000	3628,490	3,4224800	7,493120	4,874370	646,560	1726,4900	739,381
8990,0000	6230,00000	2430,000	3,9900000	4,940000	4,110000	1307,060	1890,0000	663,000
3657,3400	5314,40000	5065,980	3,6564600	3,692450	1,766890	1366,930	2114,4800	623,010
8410,0000	5490,00000	4090,000	3,4300000	6,080000	3,460000	413,132	1790,0000	696,000
8412,9200	6348,45000	2525,300	3,0769700	3,384410	3,408430	674,841	1467,3700	692,141
8360,0000	44,30000	2490,000	2,8600000	15,200000	5,840000	388,008	808,0000	550,000
8389,3200			2,9766600			421,711
8560,0000	2860,00000	4280,000	3,0800000	0,381000	4,090000	1096,650	133,0000	777,000
9245,0500	6761,76000	2331,700	2,2153300	1,621060	1,790400	364,956	439,4120	738,859
8600,0000	4670,00000	1870,000	0,6290000	0,957000	1,380000	222,573	404,0000	511,000
8053,8300	5653,11000	5193,320	3,8728800	1,203320	0,939721	1365,670	556,3760	506,059
8410,0000	6400,00000	4070,000	3,9800000	5,420000	2,020000	1328,310	2520,0000	544,000
8385,0200	4875,68000	2513,150	2,7979900	10,298100	1,713490	704,874	1729,2800	578,938
7690,0000	5360,00000	3320,000	1,1400000	2,300000	6,030000	254,027	1730,0000	517,000
8794,9800	6570,83000	2390,090	0,8073970	1,484880	1,678000	221,518	400,2540	421,383
8490,0000	6400,00000		3,6100000	0,546000		1475,780	95,9000
7251,1400	6591,80000	3949,280	4,1780100	4,305100	2,323600	1948,700	1194,9800	660,356
7250,0000	6350,00000	3620,000	4,1800000	5,340000	3,850000	1640,640	1880,0000	537,000
7980,9900	5535,36000	3341,930	3,5707000	1,086900	6,076100	1460,860	340,5710	481,766
9580,0000	7480,00000	2380,000	2,5100000	6,390000	1,430000	301,823	1110,0000	456,000
9590,3600	6498,24000	1975,250	1,9896000	5,353710	0,814249	245,185	1509,5600	373,164
9460,0000	4550,00000		1,8300000	0,946000		238,239	433,0000
6609,5500	6946,66000	4066,760	0,7762810	1,611070	2,255760	1631,460	355,0980	656,610
7570,0000	4870,00000	4110,000	1,1000000	1,220000	2,720000	1133,040	810,0000	648,000
7043,1800	4374,30000	3113,260	0,8295960	0,514140	2,805970	577,381	353,9040	664,053
9060,0000	7350,00000	2130,000	2,3100000	3,260000	2,290000	1407,170	530,0000	573,000
9043,9800	6225,48000	5462,760	2,1687500	1,396020	0,727469	1191,380	504,3020	514,130
6050,0000	6650,00000	5140,000	1,6800000	11,000000	1,810000	1593,990	1870,0000	599,000
5324,4800	6262,88000	4581,690	2,3742400	4,043740	3,469740	1961,920	1811,1400	639,162
3540,0000	3590,00000	2490,000	3,8000000	0,589000	1,900000	2198,690	238,0000	589,000
6136,8900	3697,01000	2408,220	4,0160500	2,272840	2,818320	1927,920	2300,5700	546,345
6790,0000	5560,00000	1740,000	2,5300000	5,470000	1,900000	419,386	2110,0000	524,000
5456,1300	5157,13000	4300,520		2,798670	2,015510	0,000	2139,6700	514,389
9200,0000	5350,00000	4100,000	0,7920000	6,430000	1,100000	1564,100	2090,0000	570,000
7807,6000	5587,34000	3545,070	2,3375800	3,452810	3,097250	520,717	1734,1900	566,994
6610,0000	5560,00000	2310,000	1,3900000	3,370000	1,370000	716,345	1180,0000	603,000
6699,0300	6543,30000	2395,400	1,2255500	0,685550	4,973590	739,783	155,9410	458,832
4830,0000	7890,00000	5130,000	1,2100000	0,432000	3,130000	231,499	16,9000	532,000
4277,8700	5150,89000		0,1493420	1,368920		732,949	689,5600
5040,0000	5230,00000	3330,000	0,5540000	2,640000	1,830000	896,573	595,0000	669,000
6966,9700	6390,62000	2429,270	1,4518700	4,204830	2,371370	1119,120	1912,2000	650,334
8160,0000	5210,00000	2280,000	3,9700000	10,700000	3,960000	2742,370	2050,0000	555,000
559,8940	6698,35000	1361,450	0,8056070	1,736360	1,194960	262,086	483,8060	446,678
5650,0000	5470,00000	5360,000	0,4530000	0,955000	3,870000	515,175	397,0000	545,000
5221,4200	4674,43000	3964,470	3,9378600	0,531306	2,648440	881,712	212,7630	674,514
7530,0000	8040,00000	3310,000	2,1000000	0,576000	3,710000	1648,800	12,3000	617,000
7254,5000	6551,04000	2348,510	3,9647600	3,226820	2,267220	2018,550	921,0920	507,684
4550,0000	6420,00000	2450,000	0,2830000	5,940000	3,630000	933,294	2540,0000	489,000
8857,5700	4764,83000	5323,720	2,2002500	0,724084	1,232860	1379,910	481,4930	489,848
7890,0000	4390,00000	5300,000	3,6000000	0,640000	3,970000	2162,400	289,0000	654,000
7839,7000	8171,72000	3613,050	1,8139800	0,632862	2,509170	505,446	11,3594	642,673
6770,0000	8210,00000	3660,000	1,2700000	1,980000	7,720000	459,304	73,9000	627,000
6151,7300	4387,80000	3306,710	0,3019750	11,971700	3,554520	274,977	1595,6000	580,085
6590,0000	4070,00000		0,8200000	13,000000		429,993	1940,0000
6897,0600	4660,26000	5265,150	1,0109800	5,392070	1,924360	786,893	1609,5100	620,409
6430,0000	5470,00000	3670,000	1,3800000	1,100000	0,859000	2342,240	717,0000	718,000
6389,3200	4950,02000	3653,870	1,8186800	1,120450	10,479900	2178,320	458,2700	659,188
6530,0000	6210,00000	2370,000	0,9870000	0,656000	1,920000	1268,940	120,0000	604,000
6251,2900	5279,28000	2171,600	0,6646500	0,384096	1,861080	999,181	126,6470	557,151
6460,0000	5400,00000	4330,000	0,6780000	0,368000	2,800000	941,943	125,0000	592,000
5968,2600	6802,44000	3595,830	4,1779300	0,730089	1,896650	2149,440	52,6938	581,966
5880,0000	1610,00000	2700,000	1,2300000	0,288000	2,460000	1580,600	216,0000	468,000
7954,8700	4400,50000	4070,780	0,8866340	3,573920	0,662835	1522,560	1776,1000	549,297
7610,0000	5600,00000	4360,000	2,6700000	4,590000	4,280000	2007,240	1490,0000	647,000
6507,1000	4626,61000	2657,060	3,4067800	0,870851	1,503890	2075,230	488,2500	715,664
7660,0000	5190,00000	1540,000	1,7400000	0,767000	0,957000	1352,450	439,0000	561,000
8691,3200	5260,95000	4192,350	2,1650900	2,196700	2,196970	627,951	533,1450	505,711
6250,0000	3900,00000	4930,000	1,1400000	1,620000	1,800000	1470,630	954,0000	679,000
6080,4300	4224,02000	4317,260	1,2341600	3,860360	5,449370	1502,480	1887,0000	661,565
7330,0000	5550,00000	3260,000	0,9540000	3,690000	2,050000	696,046	1690,0000	697,000
7996,8000	5663,69000	2665,140	0,7343300	6,247300	1,606920	985,205	1601,7100	600,845
7820,0000	5420,00000	2250,000	0,6720000	7,860000	1,700000	1420,350	1630,0000	566,000
7694,5400	5190,36000	4289,080	0,7970600	0,636601	1,634610	237,701	229,4260	511,567
8670,0000	5760,00000	3520,000	3,5700000	0,798000	2,170000	1305,800	317,0000	586,000
6363,6800	4825,78000	3614,510	1,5426700	0,903907	3,954370	1713,580	441,1350	563,829
7630,0000		2300,000	0,7550000		1,310000	909,760		466,000
7536,7000	6591,05000	1600,730	0,3651780	6,978040	1,436710	614,151	1069,4200	508,148
7460,0000	5440,00000	5240,000	1,0900000	9,060000	1,560000	911,257	1930,0000	561,000
7752,1000	4880,11000	4405,600	1,1481300	0,539719	4,801450	1534,970	219,2020	576,620
6120,0000	6510,00000	2510,000	1,2700000	6,340000	1,350000	1708,030	1210,0000	641,000
5295,5400	5987,35000	2571,000	0,4064540	1,062460	1,920770	646,560	392,1850	568,091
5250,0000	6170,00000	5130,000	0,4060000	3,110000	0,686000	670,713	1350,0000	525,000
5336,8900	2832,66000	4120,270	1,6718800	0,398941	1,871030	362,500	320,2000	592,374
5870,0000	4990,00000	4310,000	0,4130000	0,672000	2,020000	680,645	364,0000	654,000
8109,3000	6816,94000	3555,440	2,1905700	2,549280	1,407340	2148,920	664,7170	666,124
8090,0000	5530,00000	2530,000	3,7600000	1,360000	2,040000	1706,300	552,0000	474,000
2679,7300	4635,72000	2318,800	2,3986400	0,667752	1,821400	2300,200	258,6390	687,750
5100,0000	5040,00000	2520,000		4,310000	3,700000	0,000	1350,0000	625,000
6084,0900	6572,01000	228,473	1,0372900	5,903530	1,689460	1310,130	1333,9100	334,597
6890,0000	5790,00000	5310,000	0,7000000	8,600000	3,120000	1000,520	1210,0000	544,000
7388,3300	6988,31000	4212,390	0,8673180	0,693526	2,561100	1049,830	74,5597	642,441
6430,0000	6070,00000	2520,000	1,0500000	0,619000	1,690000	1275,600	154,0000	630,000
8219,0300	6638,46000	2463,360	2,0896300	0,598284	6,431970	598,891	108,6180	592,298
6370,0000	5450,00000	2120,000	1,1900000	0,868000	1,830000	1582,470	255,0000	467,000
6096,1400	7843,51000		1,0773700	9,486030	4,651330	2112,850	1305,1300
5660,0000	7500,00000		0,7650000	5,020000	2,120000	1359,220	980,0000
7397,3400	3752,37000		0,7939530	0,995455	1,509650	1040,060	411,4590
5630,0000	5160,00000		1,8500000	0,764000	1,900000	1646,880	235,0000
6749,1100	5253,51000		3,3280600	1,559080	1,477020	1441,490	389,5810
6850,0000	7060,00000		3,3600000	1,780000	2,270000	443,009	282,0000
7799,2900	2883,65000		1,7226200	0,584032	4,822440	1613,480	250,3600
4950,0000	5020,00000		0,3590000	8,760000	1,550000	365,696	871,0000
5749,5500	4291,74000		0,3338110	2,427330	1,565120	519,147	563,5020
8720,0000	5100,00000		0,7950000	1,080000	1,280000	562,775	302,0000
6684,4500	7778,66000		0,5374440	5,821740	6,452640	717,891	749,6950
	8040,00000		1,2700000	5,540000	1,290000	1582,800	540,0000
6430,9500	1146,95000		1,0842600	0,384840	2,335820	356,725	147,0530
2140,0000	4670,00000		0,1980000	0,479000	0,758000	248,651	167,0000
8338,0000	7465,98000		3,5572600	1,245350	2,010420	496,831	83,0205
6310,0000	3900,00000		0,2770000	4,910000	1,870000	756,873	739,0000
5730,7700	4282,23000		0,2228110	4,272790	1,462450	552,627	699,1370
8010,0000	3870,00000		1,5700000	1,530000	2,210000	275,962	546,0000
5619,6500	3557,93000		1,1429200	4,431450	1,819800	172,400	1204,0700
10000,0000	3860,00000			10,500000	3,160000	0,000	1150,0000
6489,7900	3479,99000		0,3238960	18,549800	2,223820	548,727	1548,8200
5950,0000	5610,00000		0,3730000	0,959000	2,480000	600,383	444,0000
5470,6000	5011,33000		0,3847060	6,326950	2,623580	553,612	1248,9800
7160,0000	3310,00000		0,8580000	1,050000	1,880000	1811,650	471,0000
7513,3600	1088,83000		0,7281350	0,481416	6,219460	1111,300	270,5020
5630,0000	986,00000		1,7900000	0,352000	1,660000	1905,530	211,0000
5419,5200	3957,08000		0,8819490	0,459762		2133,450	180,2530
1900,0000	5160,00000		0,4790000	0,502000		319,242	143,0000
6423,1200	7798,54000		0,6025030	2,210650		1163,280	106,3330
8790,0000	625,00000		0,6520000	0,479000		782,195	232,0000
7390,3500	5606,51000		0,3578620	10,806200		550,062	1109,6000
7820,0000	7660,00000		1,2200000	7,310000		976,570	994,0000
5463,0600			0,2782150			516,705
1830,0000	4210,00000		0,5170000	2,930000		203,404	2090,0000
8375,9500	4855,12000		2,9189200	4,231590		353,490	1758,2100
2850,0000	4010,00000		2,0600000	13,300000		2129,020	1660,0000
1818,9100	4531,12000		1,9375800	6,912580		2528,990	2385,7700
4190,0000	5530,00000		0,1880000	1,180000		496,164	573,0000
8290,4400	6381,97000		2,7508300	1,068300		294,022	290,0430
6570,0000	6950,00000		0,6630000	2,450000		1156,280	525,0000
7790,2100	6364,97000		1,8050200	1,247990		1964,030	457,8310
7930,0000	4250,00000		2,0600000	13,300000		1824,490	1730,0000
3603,4000	4360,00000		3,9866600	22,028100		2085,700	2036,4400
3590,0000	4230,00000		3,9800000	3,790000		2061,680	1920,0000
3477,6300	4346,43000		3,7972500	12,328600		1756,460	1792,4500
4950,0000	4160,00000		1,6900000	0,821000		1799,520	490,0000
4602,4600	6056,09000			2,265550		0,000	435,6570
5890,0000	5020,00000		1,4100000	6,080000		228,276	1330,0000
7806,0400	4199,29000		1,6847400	2,928830		307,478	908,2410
9370,0000			1,5000000			212,465	0,0000
7613,5700	4176,90000		0,7269780	1,879080		556,917	581,3790
8780,0000	4910,00000		2,0400000	12,500000		607,237	2320,0000
7682,5600	5352,04000		0,3409950	14,712000		530,154	2397,1700
2220,0000	4880,00000		4,1600000	2,210000		1998,060	1100,0000
6662,2400	6067,53000		0,7121790	3,087340		970,500	1245,8300
5260,0000	4790,00000		0,8250000	5,250000		1597,490	1510,0000
7054,1800	5668,83000		0,7079380	1,751290		433,387	856,2890
6380,0000	6430,00000		1,2800000	7,090000		591,055	1120,0000
7140,1900			1,1355600			1256,690
5580,0000	5690,00000		1,3000000	6,080000		1498,110	1540,0000
8488,1100			3,1141900			1204,200
6700,0000	6000,00000		0,1740000	12,300000		855,460	1590,0000
5029,1100	6297,77000		0,2639080	7,709910		819,864	2013,6600
4830,0000	5690,00000		0,0846000	13,500000		379,652	1420,0000
7043,9000	6448,03000		0,6122500	10,372400		667,408	1670,3700
5880,0000	6540,00000		4,1200000	2,190000		1620,010	530,0000
5874,9800	5987,16000		4,0188300	2,732260		1636,140	335,7490
5110,0000	5820,00000		0,6110000	0,552000		1318,850	180,0000
6478,4700	5981,18000		0,5108270	3,964800		987,855	1402,5600
5450,0000	5210,00000		1,1300000	0,786000		1602,170	478,0000
5845,1600	5350,71000		4,0024200	2,213270		1877,390	403,9870
5900,0000	4900,00000		4,1200000	2,630000		1695,340	1870,0000
6885,0700	5732,36000		2,5592000	3,180190		1463,670	1973,3600
6290,0000	5840,00000		0,3280000	4,130000		662,098	1910,0000
1333,8000	5190,84000		0,1021420	0,979385		232,623	416,3840
5550,0000	5770,00000		0,5370000	6,110000		228,999	1220,0000
5496,6500	5654,04000		1,1037300	2,273010		121,420	1504,0000
5260,0000	5380,00000		1,7300000	1,000000		1318,330	581,0000
7307,6200	4968,61000		0,3439090	2,124950		594,693	1031,9400
6390,0000	6500,00000		0,3990000	2,080000		468,465	508,0000
7519,6900	5045,65000		0,8561520	0,599476		1019,330	333,5200
6920,0000	5290,00000		0,7520000	3,840000		771,022	1300,0000
8147,4500	4998,71000		3,7313000	2,378630		1693,870	1723,6800
6900,0000	5520,00000		0,4140000	1,650000		801,292	589,0000
7454,8400	6449,33000		0,4805690	1,527740		676,688	314,6250
6680,0000	6310,00000		0,4310000	5,450000		480,538	1150,0000
7415,8900	4643,33000		0,9309580	2,066090		962,785	790,6630
6080,0000	4250,00000		0,4530000	13,200000		163,981	1660,0000
	5478,27000		0,6305650	13,882300		1231,000	1835,1700
7360,0000	5040,00000		0,5470000	2,830000		978,992	2230,0000
7806,6000	6551,28000		1,2754400	8,311850		1276,600	1930,1100
7710,0000	19,10000		1,0800000	34,400000		873,685	926,0000
7855,6900	6228,96000		1,3075500	4,227050		776,959	1264,3000
7360,0000	5900,00000		0,5400000	1,920000		425,565	332,0000
5295,3800	5863,92000		0,0976451	2,948100		430,279	1743,0700
6630,0000	6450,00000		0,5620000	2,760000		750,505	1370,0000
6194,8400	6491,12000		0,3405280	1,448370		445,034	610,9730
4880,0000	6640,00000			2,680000		0,000	1110,0000
7545,4900	6353,63000		1,2420400	0,843243		1153,760	284,9950
7960,0000	7930,00000		0,7190000	0,925000		617,242	25,2000
5607,9300	6488,70000		0,4778810	2,965250		993,604	1326,8900
	5090,00000		1,2000000	0,803000		2383,240	372,0000
5106,8100	5135,04000		1,3705600	1,036710		1633,590	465,5140
6170,0000	4950,00000		0,3880000	1,570000		725,438	327,0000
5648,8000	6418,73000		0,1369580	1,489440		191,360	446,5090
9150,0000	6450,00000		0,9510000	1,320000		756,591	387,0000
7386,4100	7832,41000		0,3422250	0,602821		199,171	24,4567
5940,0000	4450,00000		0,7890000	1,610000		245,395	627,0000
6627,6900	4463,13000		0,3134640	22,201000		227,248	1703,5200
7420,0000	5070,00000		0,6890000	2,230000		738,152	1790,0000
8185,4300	5420,21000		2,6614000	4,351690		1556,850	1727,0800
6480,0000	5530,00000		0,9150000	1,330000		1353,760	793,0000
5828,4400	5497,08000		0,4658910	2,065380		889,094	897,9250
5950,0000	6220,00000		0,3260000	3,250000		472,540	1510,0000
7189,9500	5747,10000		0,8715810	2,745890		1060,300	488,2120
7590,0000	6340,00000		0,9300000	6,160000		808,837	1210,0000
4508,4300	5267,00000		0,2071270	3,019850		446,928	1996,3300
4990,0000	5430,00000		0,6440000	4,830000		1389,590	1770,0000
6228,0900	5050,62000		0,6078620	1,112850		1179,690	768,5180
6240,0000	5300,00000		0,4340000	4,230000		626,755	1940,0000
7540,0800	6300,38000		1,2759900	9,752570		1320,640	1762,6900
8000,0000	5910,00000		3,1000000	2,740000		1412,700	691,0000
36,4471	6225,82000		4,1211400	3,717690		637,525	1350,2600
4240,0000	6180,00000		0,0679000	0,933000		241,303	313,0000
5181,2500			0,1633220			296,723
6810,0000			0,2200000			177,298
4738,1200			0,2085890			1046,350
5150,0000			0,5620000			1217,540
5572,5600			0,4879000			1074,710
4100,0000			0,4130000			1571,420
3908,8800			0,4144670			1528,830
3120,0000			3,3300000			1772,690
5687,7000			0,5381130			664,470
6760,0000			0,2990000			1439,760
6187,0200			0,5317440			1053,470
5310,0000			0,2960000			606,564
3928,9400			0,0999905			358,219
3710,0000			0,1340000			264,317
5456,5400			0,1672050			255,927
5900,0000			0,1550000			175,259
4472,0700			0,0794277			360,855
6140,0000			1,7900000			1698,360
5578,6300			1,3044200			1397,060
