# Supplementary material for: Fast bacterial growth reduces antibiotic accumulation and efficacy
Source: eLife. 2022 Jun 7;11:e74062. doi: 10.7554/eLife.74062 (PMC9173744; doi:10.7554/eLife.74062)
Supplement: Figure 5—source data 2. — Distributions of single-cell values for the kinetic parameters t0, k1 and Fmax describing the accumulation of the fluorescent derivative of roxithromycin (at 46 µg mL–1 in M9) in the knockout mutant ΔompC. [file elife-74062-fig5-data2.csv]

ΔompC t0 (s)	ΔompC k1 (a.u. s-2)	ΔompC Fmax (a.u.)
5181,25	1,220000	487,000
6810,00	1,110000	1953,040
4738,12	1,290000	1642,930
5150,00	0,370000	1611,850
5572,56	2,050000	1265,690
4100,00	0,170000	961,689
3908,88	3,220000	1023,620
3120,00	0,530000	945,601
5687,70	0,650000	1152,780
6760,00	0,680000	621,560
6187,02	1,260000	1307,060
5310,00	3,460000	1298,310
3928,94	4,050000	694,874
3710,00	3,470000	214,027
5456,54	3,030000	181,518
5900,00	2,970000	1272,780
4472,07	2,920000	1778,700
6140,00	3,110000	1592,640
5578,63	2,250000	1354,860
8461,54	0,690000	299,823
8570,00	3,872880	247,185
7117,18	3,960000	228,239
8410,00	1,890000	192,304
8344,77	0,830000	224,977
8300,00	1,020000	389,993
8099,51	0,910000	775,893
7720,00	2,420000	2241,240
8381,23	2,168750	2088,320
7790,00	1,160000	1272,940
6685,70	2,440000	989,181
6790,00	3,670000	938,943
7031,21	3,110000	2103,440
7070,00	2,550000	1576,000
6318,54	0,290000	650,713
7730,00	0,450000	322,500
6464,35	0,770000	675,645
6490,00	0,550000	2141,920
8373,53	1,360000	1678,300
9460,00	1,110000	2314,200
6609,55	0,050000	0,000
7570,00	2,557260	1307,130
7043,18	0,410000	1021,520
9060,00	0,710000	1019,830
9043,98	1,320000	1265,600
6050,00	1,160000	268,000
5324,48	1,070000	175,400
3540,00	1,110000	0,000
6136,89	2,540000	523,727
6790,00	0,090000	586,383
8053,83	0,340000	549,612
8510,00	1,160000	1785,650
8785,02	1,750000	1115,300
7610,00	3,350000	1897,530
8754,98	2,220000	2150,450
8890,00	1,430000	304,242
7255,14	1,860000	1171,280
7280,00	1,110000	754,195
7990,99	2,330000	608,055
9880,00	1,940000	1232,690
9790,36	2,660000	1476,110
9530,00	0,040000	1289,200
7925,00	0,780000	875,460
7593,54	2,350000	802,864
8872,00	2,050000	313,652
6264,68	1,050000	653,408
7833,00	1,990000	1600,010
7839,70	1,270000	1676,140
7665,00	0,121975	1332,850
7759,10	0,820000	1357,330
6718,00	1,010980	504,693
5798,54	1,380000	469,465
5551,00	1,818680	1021,330
6735,95	0,987000	771,022
2437,00	0,664650	1293,870
8537,00	0,678000	501,292
6714,00	4,177930	376,688
5736,77	1,230000	280,538
8110,00	0,644000	762,785
5631,65	0,607862	169,981
11000,00	0,434000	248,395
6499,79	1,275990	235,248
5957,00	3,100000	721,152
5673,60	3,121140	1506,850
6570,00	0,067900	1349,760
7790,21	0,163322	849,094
7930,00	0,220000	482,540
3705,40	0,208589	1090,300
3893,00	0,562000	701,837
3581,63	0,080000	496,928
4952,00	1,148130	1289,590
4806,46	1,170000	667,470
5990,00	0,706454	1458,760
7808,04	0,606000	1093,470
9477,00	1,171880	601,564
7240,19	0,110000	258,219
5584,00	1,190570	292,317
8481,11	3,260000	245,927
6745,00	1,398640	176,259
5033,11	2,200000	362,855
4930,00	2,764760	1693,360
